# Supplementary material for: Polymer Blends Based on 1-Hexadecyl-3-methyl Imidazolium 1,3-Dimethyl 5-Sulfoisophthalate Ionic Liquid: Thermo-Mechanical, Surface Morphology and Antibacterial Properties
Source: MDPI journal article supplement (doi:10.3390/polym15040970), 2023-02-16
Supplement: s1 [file s1]

# Polymer Blends Based on 1-Hexadecyl-3-Methyl Imidazolium 1,3-Dimethyl 5-Sulfoisophthalate Ionic Liquid: Thermo-Mechanical, Surface Morphology and Antibacterial Properties

Daniela C. Zampino <sup>1,\*</sup>, Filippo Samperi <sup>1,\*</sup>, Monique Mancuso <sup>2,3</sup>, Tiziana Ferreri <sup>4</sup>, Loredana Ferreri <sup>4</sup>, Sandro Dattilo <sup>1</sup>, Emanuele F. Mirabella <sup>1</sup>, Domenico C. Carbone <sup>1</sup>, Giuseppe Recca <sup>1</sup>, Andrea A. Scamporrino <sup>1</sup>, Elisabetta Novello <sup>1</sup> and Concetto Puglisi <sup>1</sup>

<sup>1</sup> Institute of Polymers, Composites and Biomaterials (IPCB)-CNR, Section of Catania, Via Paolo Gaifami, 18, 95126 Catania, Italy

<sup>2</sup> Institute for Biological Resources and Marine Biotechnology (IRBIM)-CNR, Section of Messina, Spianata San Raineri, 86, 98122 Messina, Italy

<sup>3</sup> Department of Integrative Marine Ecology, Stazione Zoologica "Anton Dohrn", Sicily Marine Centre, Contrada Porticatello, 29, 98167 Messina, Italy

<sup>4</sup> Institute of Biomolecular Chemistry (ICB)-CNR, Section of Catania, Via Paolo Gaifami, 18, 95126 Catania, Italy

\* Correspondence: danielaclotilde.zampino@cnr.it (D.C.Z.); filippo.samperi@cnr.it (F.S.)

**Table S1.** Structural assignments of cations and adducts identified in the MALDI-TOF mass spectra of the ILs 1-hexadecyl-3-methylimidazolium bromide (HdmimBr) and 1-hexadecyl-3-methylimidazolium 1,3-dimethyl 5-sulfoisophthalate (HdmimDMSIP).

| Symbols                                                    | Structures                                                                          | Measured m/z | Calculated m/z |
|------------------------------------------------------------|-------------------------------------------------------------------------------------|--------------|----------------|
| Hdmim <sup>+</sup>                                         | 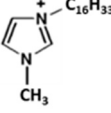 | 307.4071     | 307.3113       |
| Hdmim <sup>+</sup> Br <sup>-</sup> + Hdmim <sup>+</sup>    |  | 694.994      | 694.978        |
| Hdmim <sup>+</sup>                                         |  | 307.3396     | 307.3113       |
| Hdmim <sup>+</sup> DMSIP <sup>-</sup> + HDMIm <sup>+</sup> |  | 887.7729     | 887.6296       |

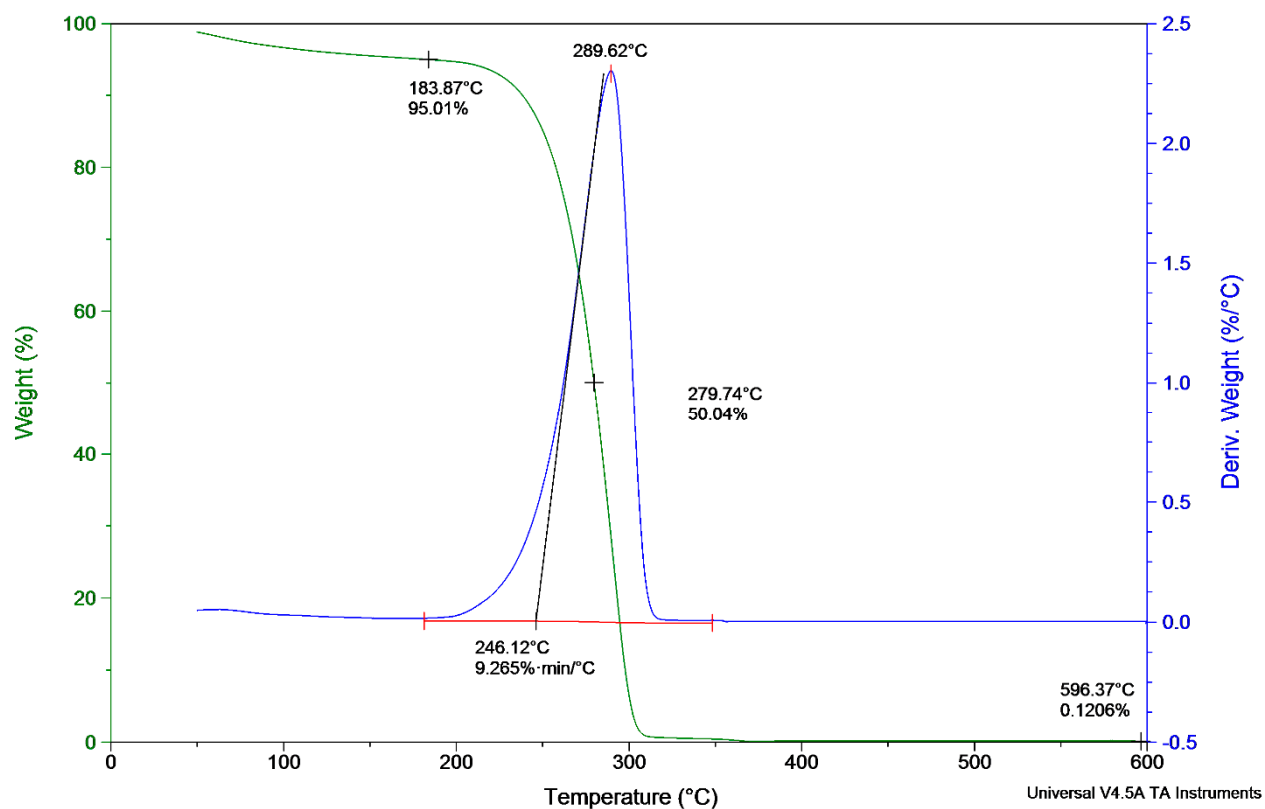

**Figure S1.** TGA of the IL 1-hexadecyl-3-methylimidazolium bromide (HdmimBr).

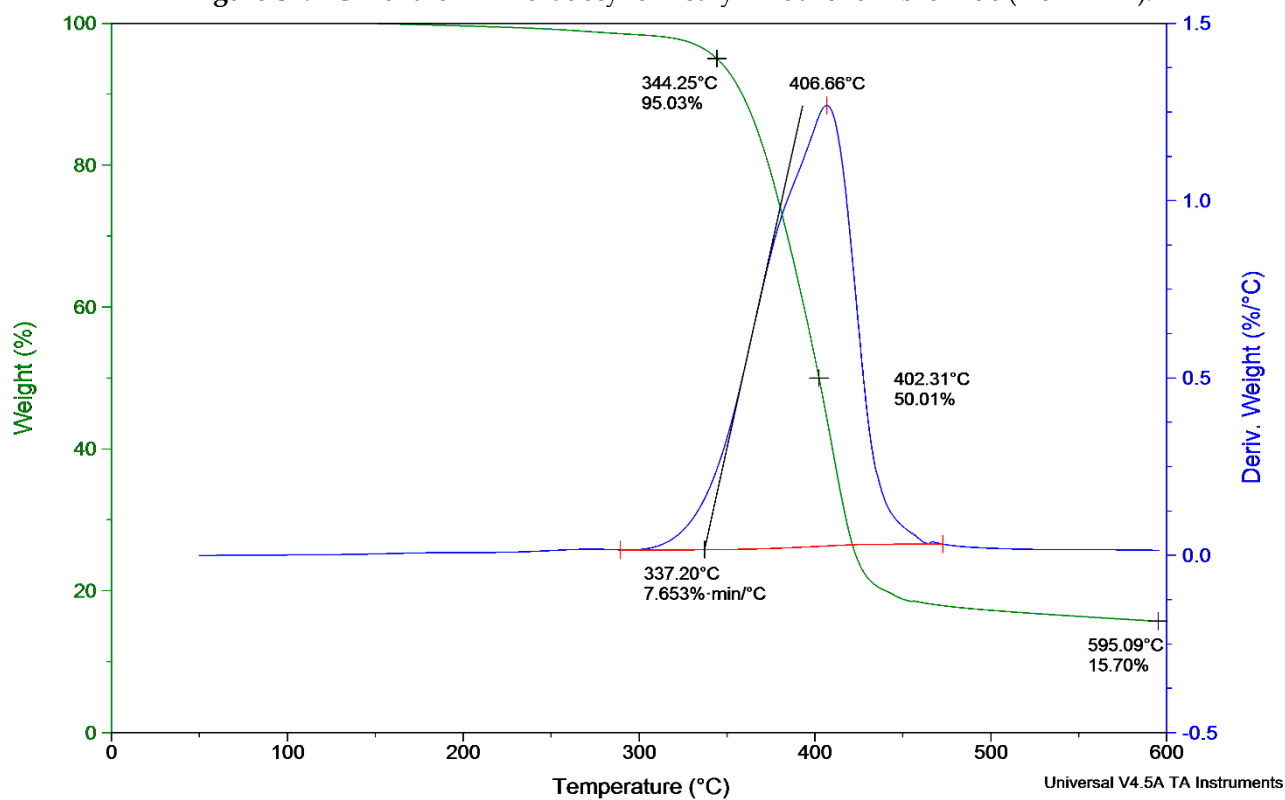

**Figure S2.** TGA of the IL 1-hexadecyl-3-methylimidazolium 1,3-dimethyl 5-sulfoisophthalate (HdmimDMSIP).

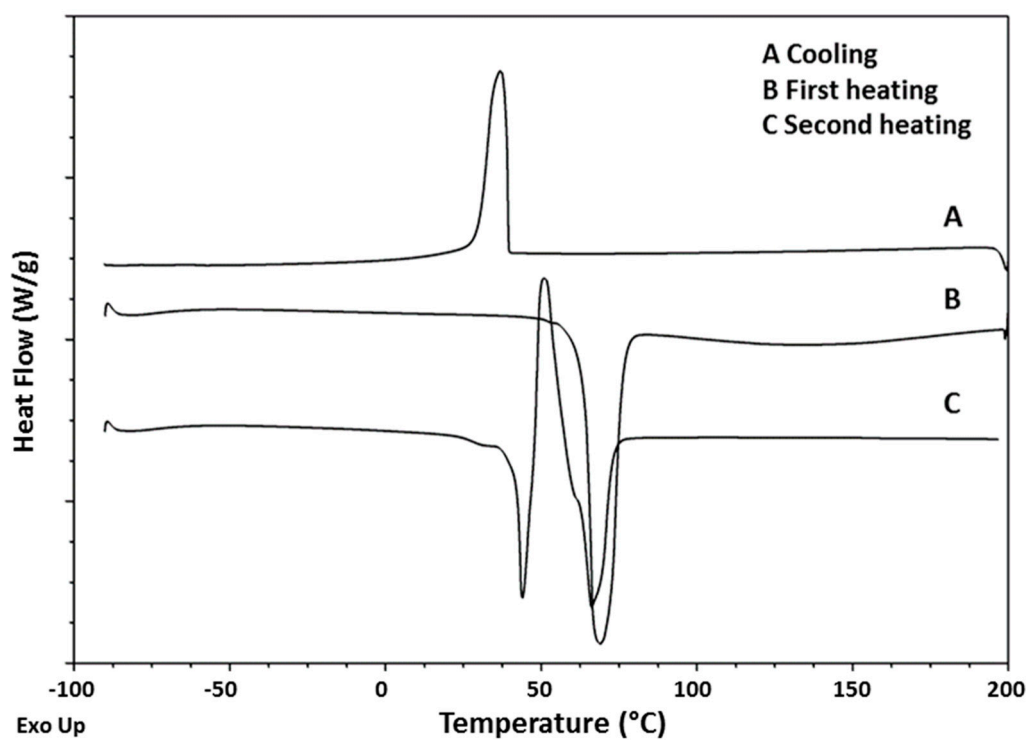

**Figure S3.** DSC of the IL 1-hexadecyl-3-methylimidazolium bromide (HdmimBr). Curves are displaced for clarity.

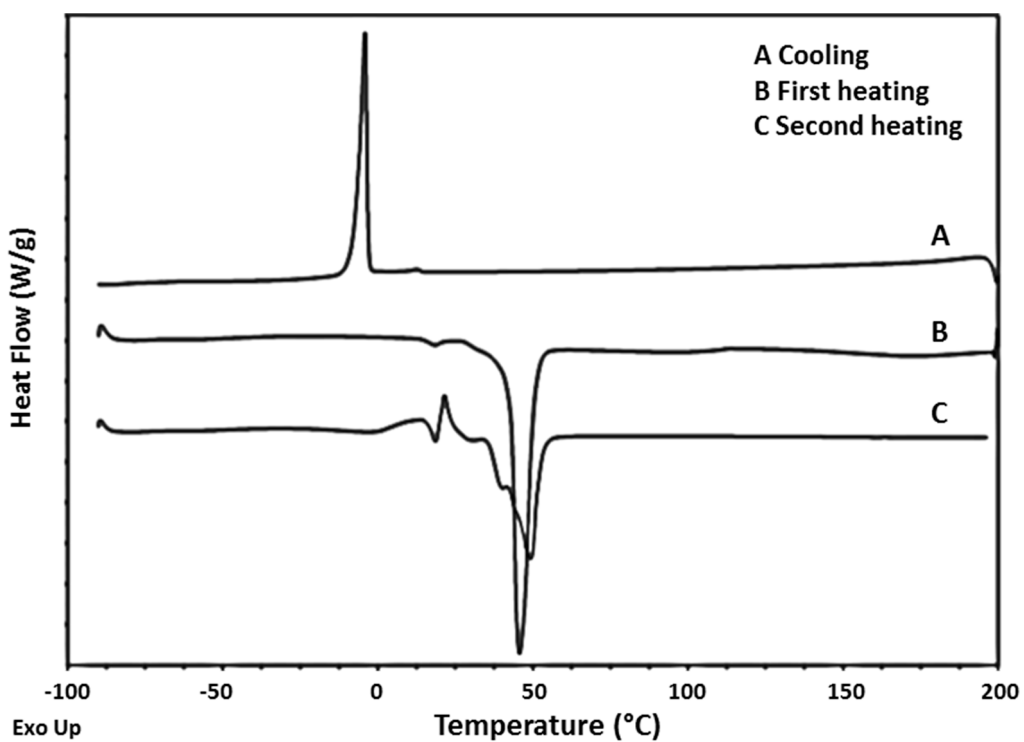

**Figure S4.** DSC curves of the IL 1-hexadecyl-3-methylimidazolium 1,3-dimethyl 5-sulfoisophthalate (HdmimDMSIP). Curves are displaced for clarity.

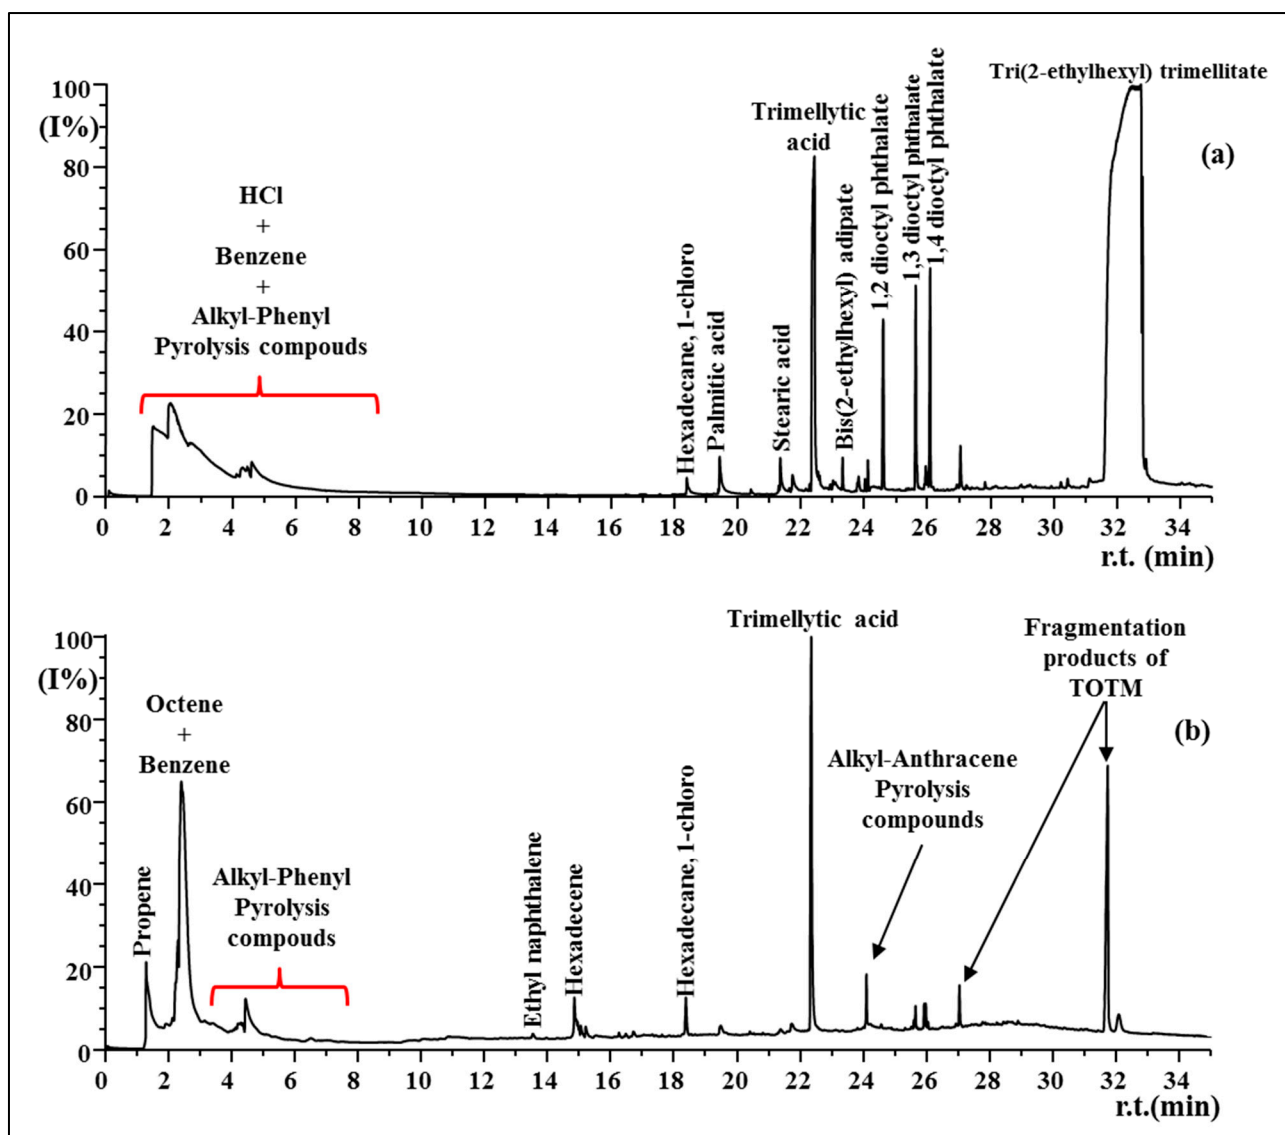

Figure S5. Py-GCMS pyrograms of the pyrolysis products of the PVC/1% HdmimDMSIP blend at (a) 300°C and (b) 450 °C.

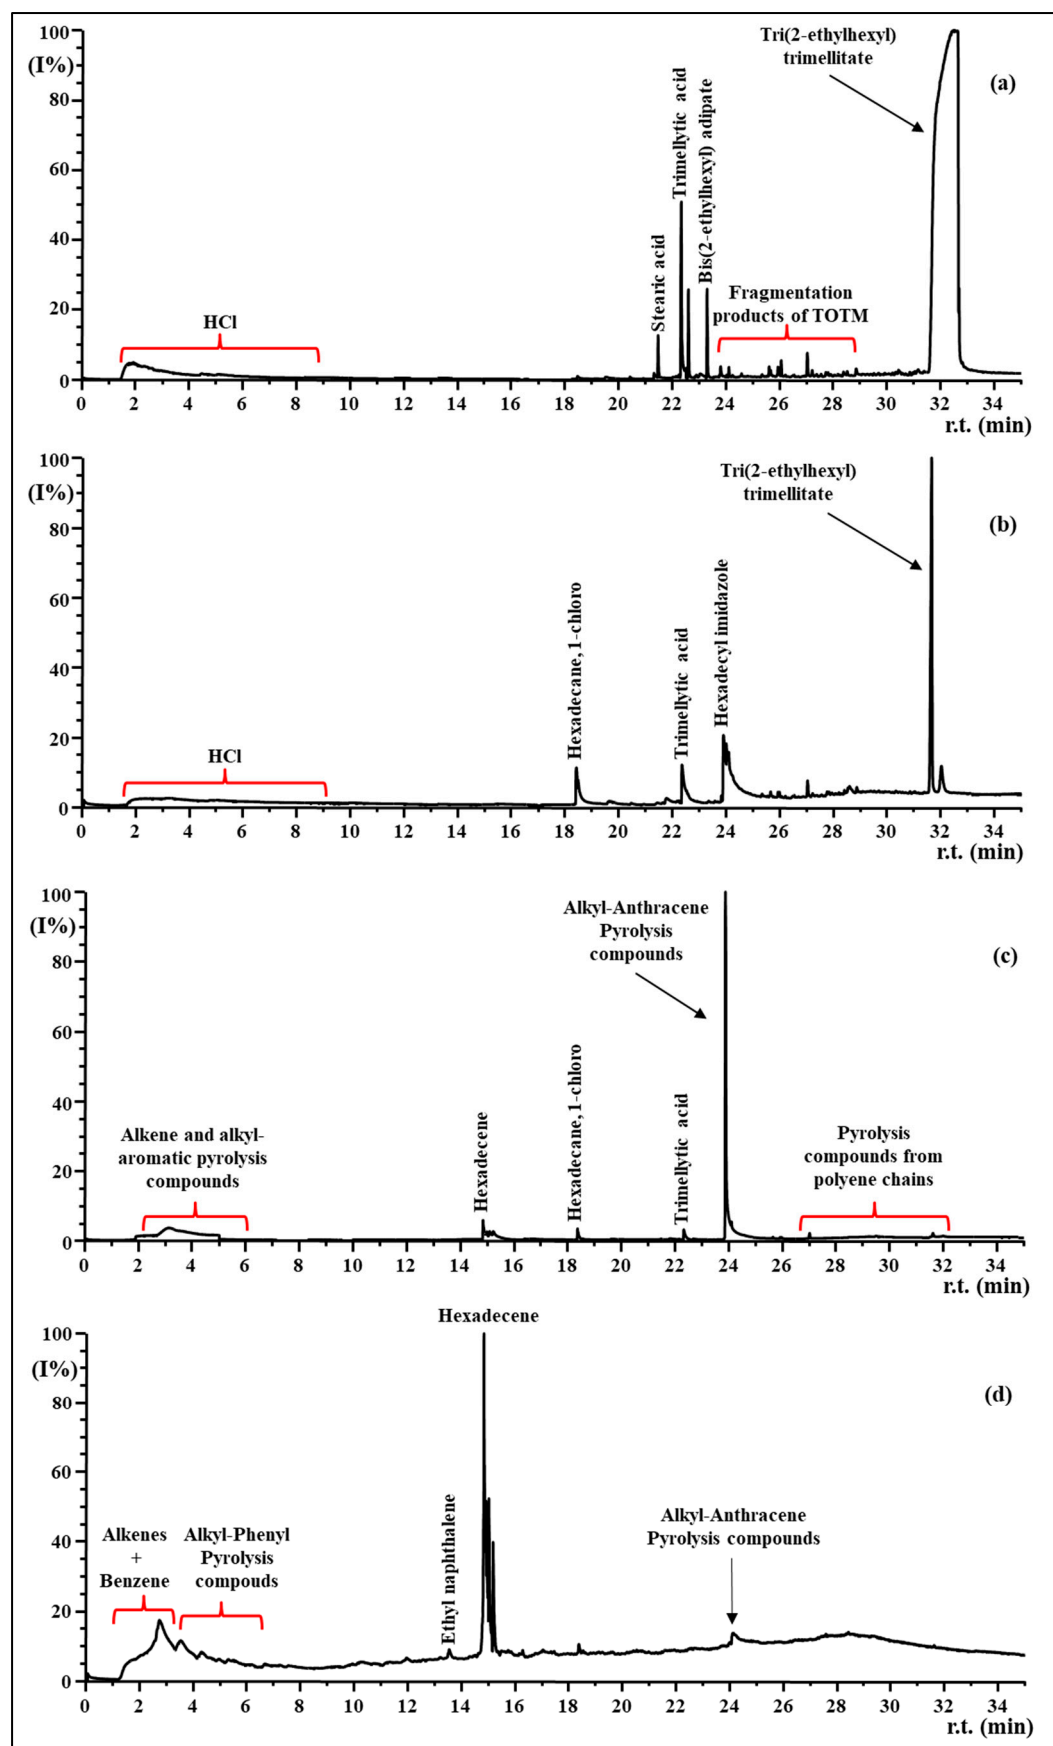

**Figure S6.** Py-GCMS pyrograms of the pyrolysis products of the PVC/5% HdmimDMSIP blend at (a) 260°C, (b) 300°C and (c) 350 and (d) 450 °C.

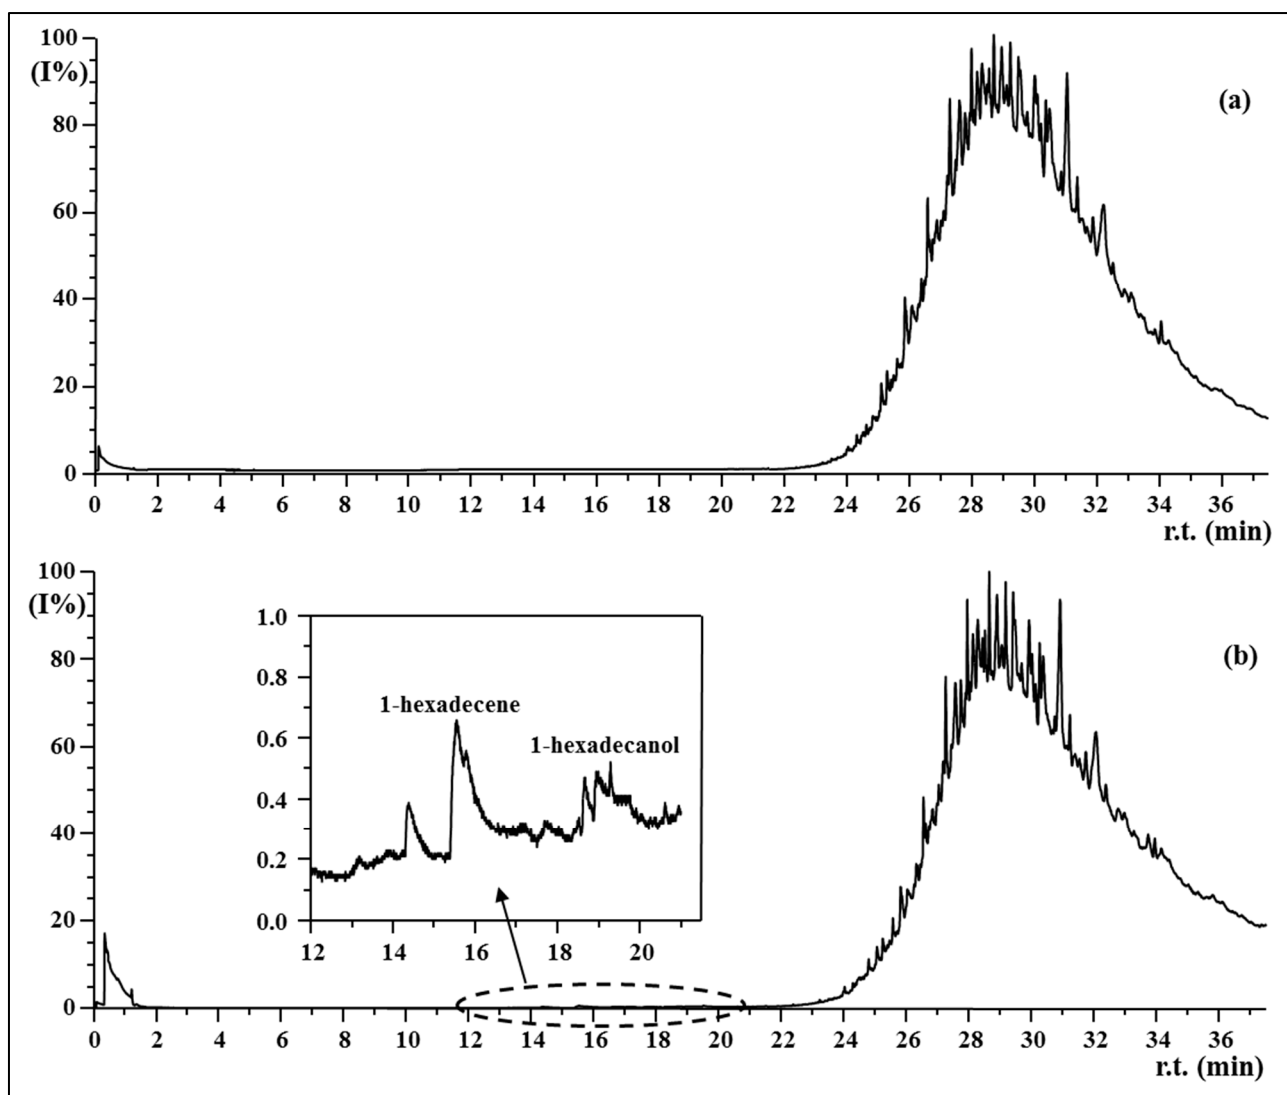

**Figure S7.** Py-GCMS pyrograms of the pyrolysis products of the neat SEBS (a) and SEBS/10% HdmimDMSIP blend (b) both at 300°C. The inset shows the fragmentation products from the HdmimDMSIP.

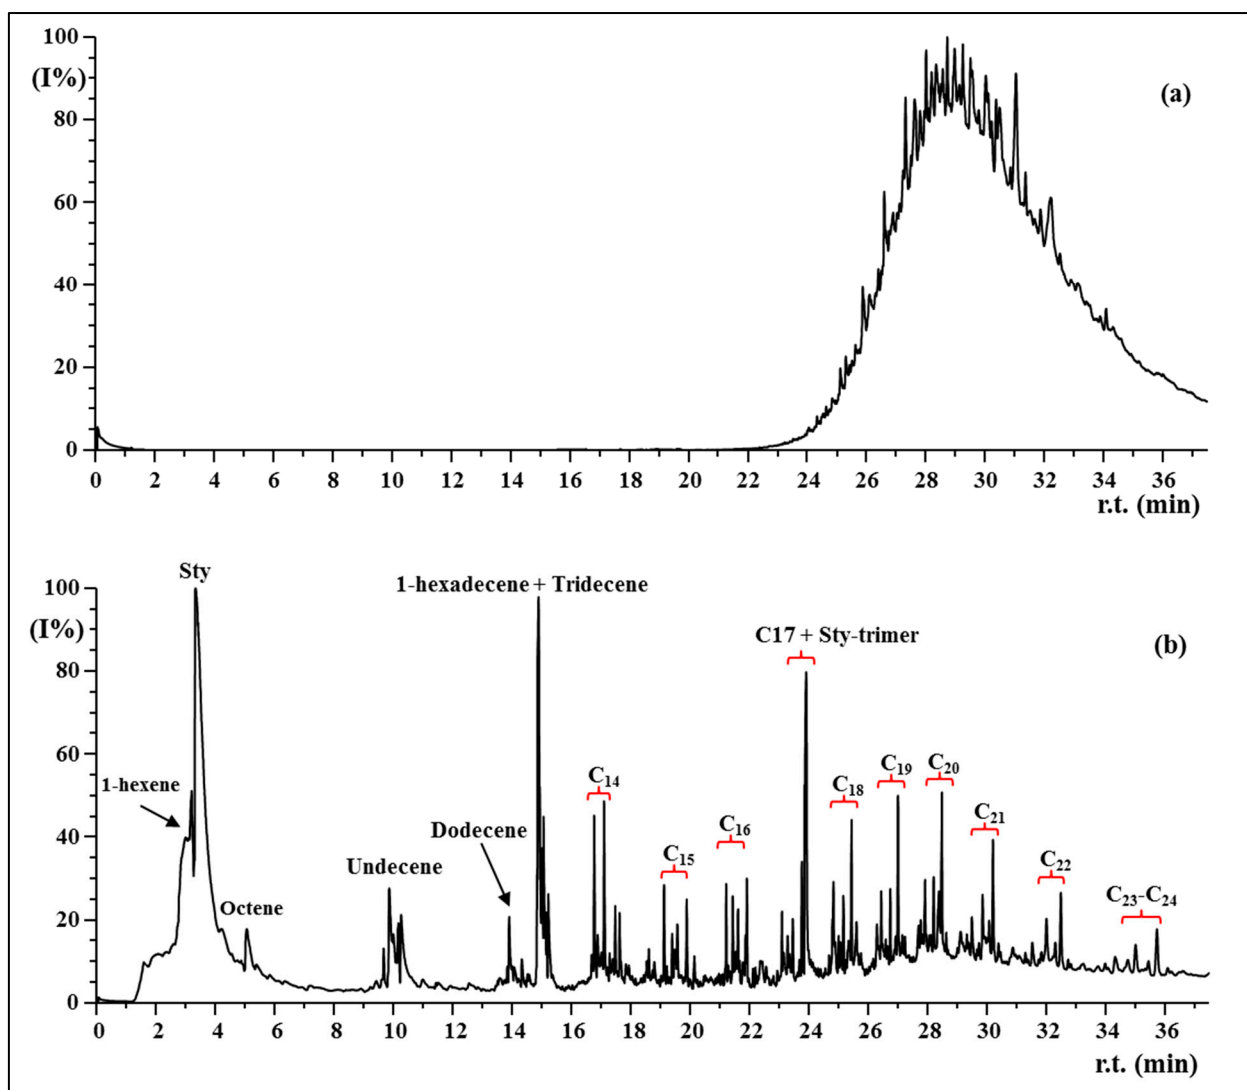

**Figure S8.** Py-GCMS pyrograms of the pyrolysis products of the SEBS/5% HdmimDMSIP blend at (a) 300°C and (b) 450 °C.

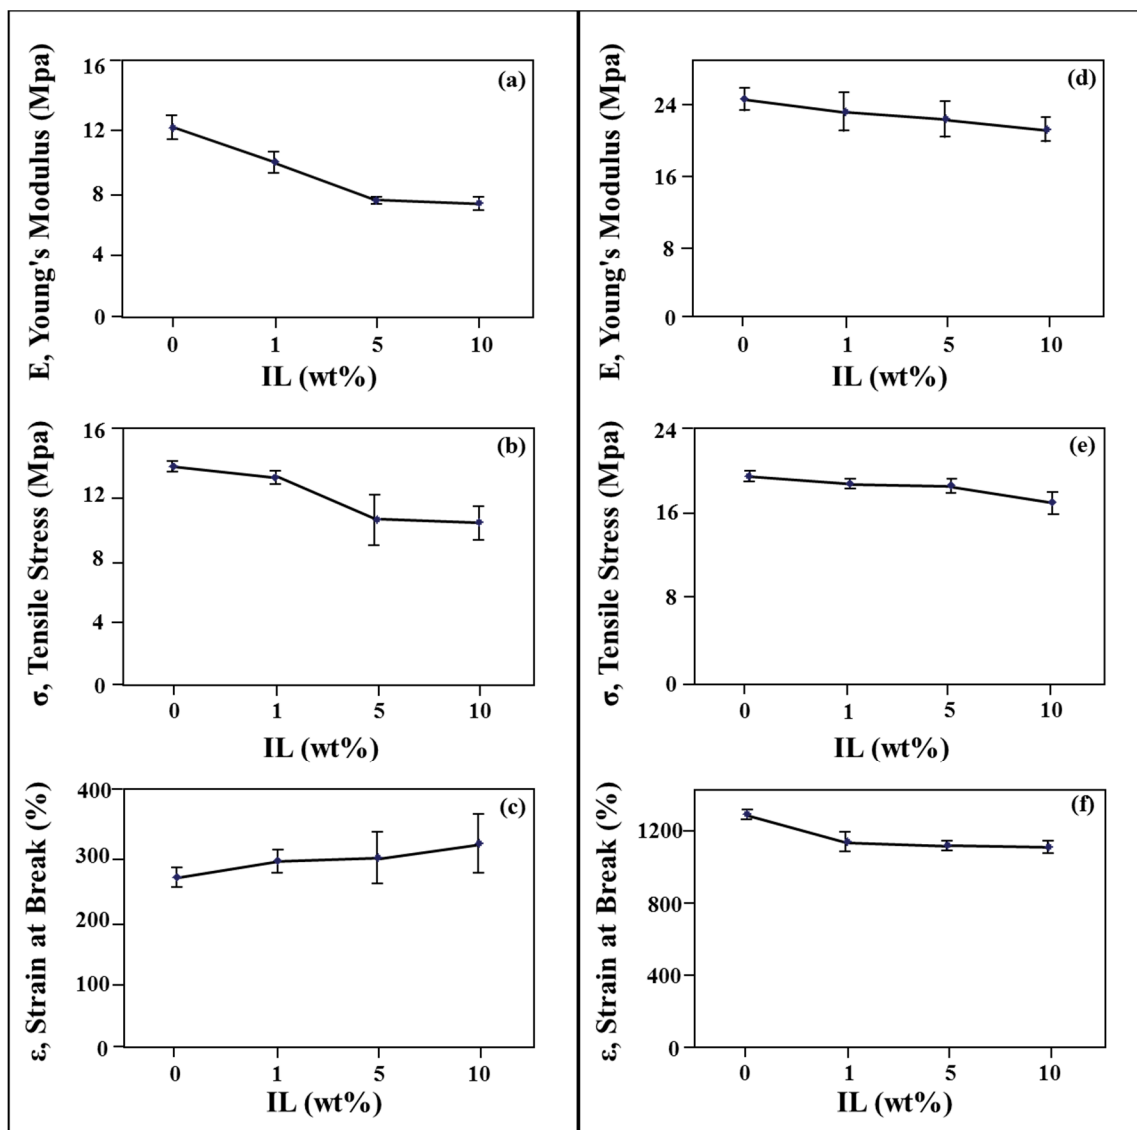

**Figure S9.** Mechanical properties (Young's modulus, Tensile strength and Elongation at break percentage) of the PVC/HdmimDMSIP (a,b,c) and SEBS/HdmimDMSIP (d, e, f) blends as HdmimDMSIP % increases.



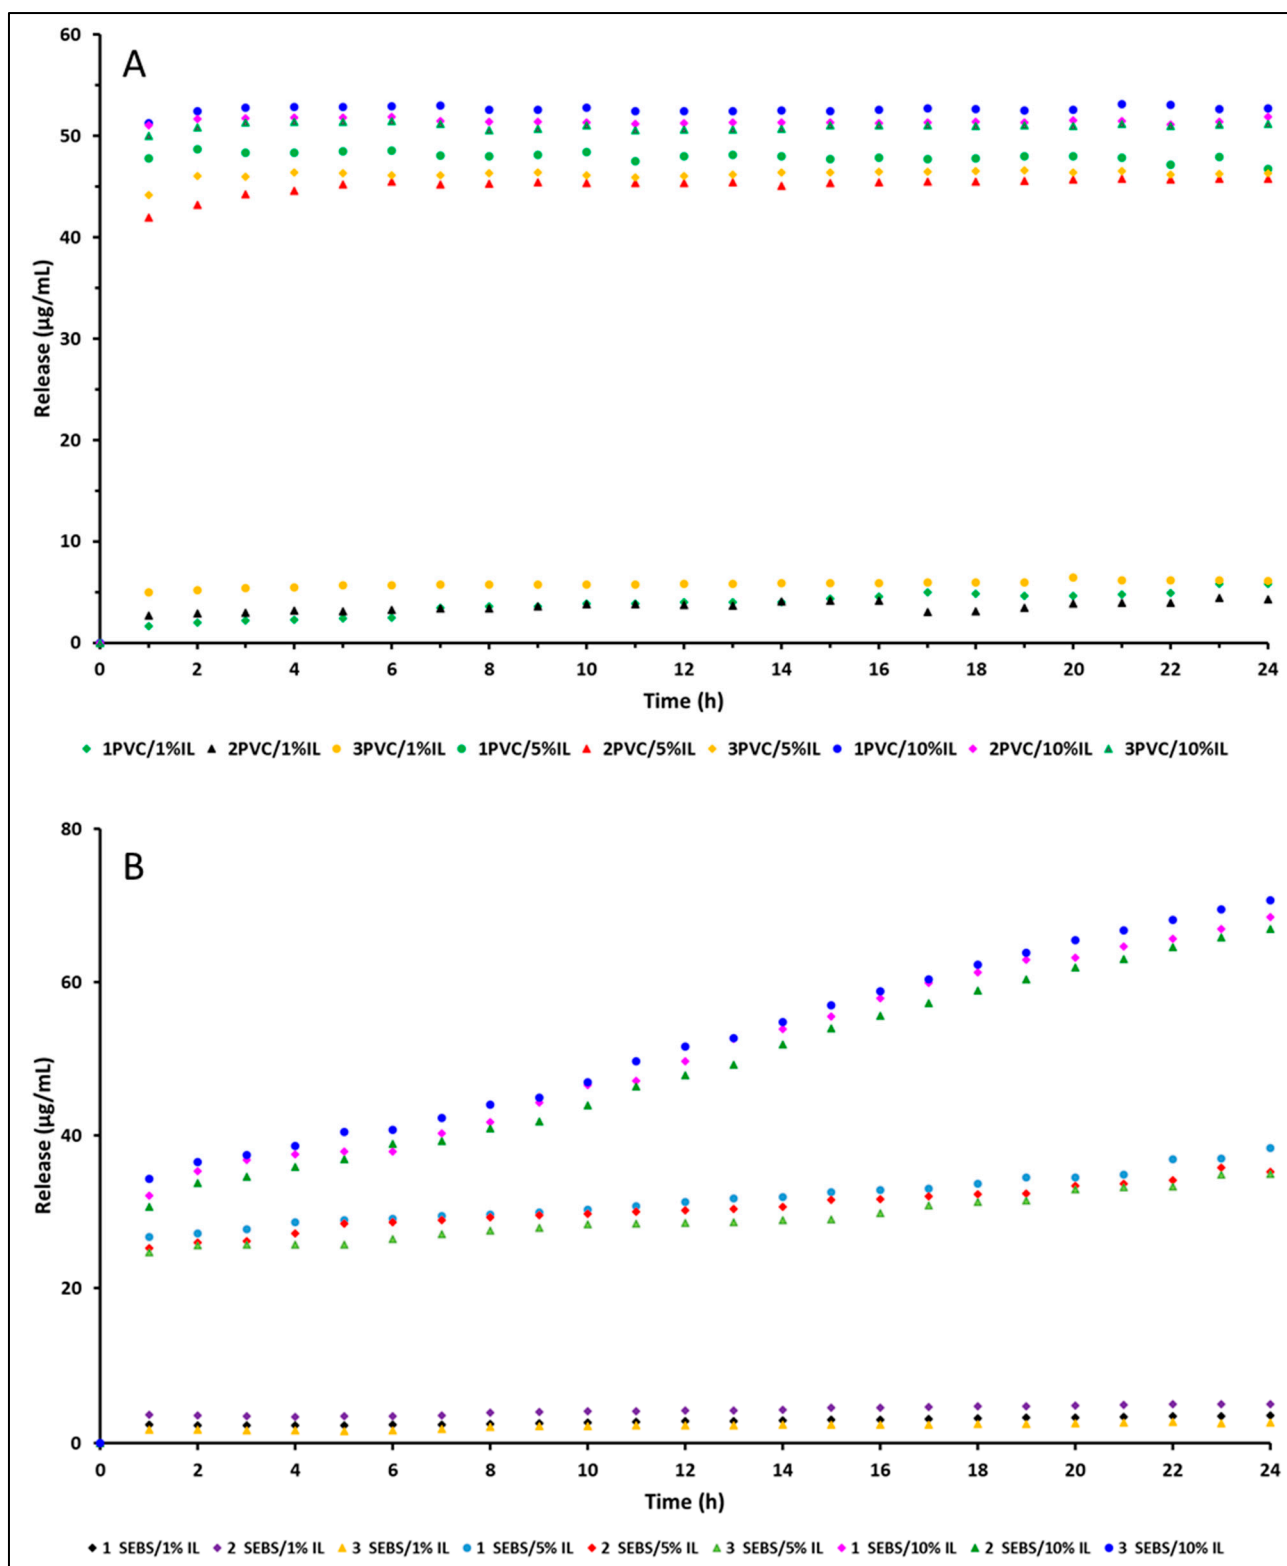

**Figure S10.** IL release from (A) PVC/HdmimDMSIP and (B) SEBS/HdmimDMSIP blends. Each point represents the HdmimDMSIP release from the PVC/HdmimDMSIP and SEBS/HdmimDMSIP blends at fixed times (1-24 h).

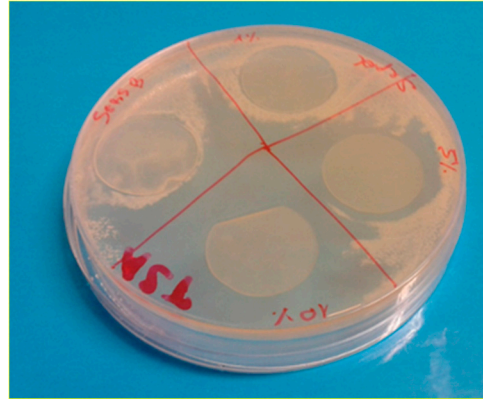

**Figure S11.** Inhibition haloes induced by the SEBS/HdmimDMSIP blends, loaded with three different concentration of HdmimDMSIP (0.5%, 1%, 5%), on TSA seeded with *S. epidermidis* ( $10^6$  CFU/ml).
